# Supplementary material for: Upregulated lncARAT in Schwann cells promotes axonal regeneration through recruiting macrophages and inducing macrophages M2 polarization
Source: Research Square preprint supplement (doi:10.21203/rs.3.rs-543511/v2), 2021-10-11
Supplement: Supplementary file 1 [file 4aeeb068d24f2e489ef0ed02.xlsx]

## Sheet: Sheet1
	Supporting Table S5. The top10 lncRNAs ranked by fold change.
lncRNA_id	locus	length	T-1_count	T-2_count	T-3_count	C-1_count	C-2_count	C-3_count	T-1_FPKM	T-2_FPKM	T-3_FPKM	C-1_FPKM	C-2_FPKM	C-3_FPKM	T	C	log2FC	Pvalue	Qvalue	updown
NONRATT031003.2	X:77020429-77023113	2685	1	1	1	1171	1367	1001	0.0130701	0.0131166	0.01418	16.3292	18.3082	14.2654	0.0134556	16.3009	-10.2425	4.24094e-48	3.85141e-44	DOWN
NONRATT000737.2	1:104939945-104941553	1609	1	1	1	2429	91	1	0.0218105	0.0218882	0.0236627	56.523	2.03378	0.0237728	0.0224538	19.5268	-9.76428	3.72199e-07	0.000204856	DOWN
NONRATT010331.2	15:24100810-24101858	1049	1989	1998	1830	3	3	3	66.5473	67.0844	66.4154	0.107095	0.102857	0.109428	66.6824	0.10646	9.29085	7.68371e-53	1.39559e-48	UP
NONRATT001526.2	1:225210580-225211421	842	38	2801	2777	5	6	6	1.58394	117.166	125.562	0.222358	0.256246	0.27266	81.4373	0.250421	8.34519	8.95616e-12	2.42375e-08	UP
NONRATT007164.2	11:84919056-84920290	1235	1	1	1	699	230	1	0.0284155	0.0285167	0.0308286	21.1916	6.69701	0.030972	0.0292536	9.30653	-8.31349	7.63347e-08	5.54587e-05	DOWN
NONRATT026655.2	7:29959586-29961154	1569	3639	9	5	6	5	3	81.4011	0.202038	0.12133	0.143179	0.114591	0.0731613	27.2415	0.110311	7.94809	1.86189e-05	0.00603885	UP
NONRATT026656.2	7:29963184-29964257	1074	2228	2264	6	3	9	9	72.8085	74.2461	0.2127	0.104602	0.301356	0.320643	49.0891	0.2422	7.66306	2.7256e-08	3.09407e-05	UP
NONRATT030205.2	9:84894169-84894624	456	1	1	1	501	1	1	0.0769586	0.0772326	0.083494	41.1364	0.0788723	0.0838825	0.0792284	13.7664	-7.44092	7.31974e-05	0.0187251	DOWN
NONRATT016668.2	2:197887692-197888488	797	2	2	5	726	3	625	0.088063	0.0883766	0.238854	34.1061	0.135379	30.0065	0.138431	21.416	-7.27338	5.01165e-08	4.13757e-05	DOWN
NONRATT003829.2	1:264298811-264303479	435	291	1	1	0	1	1	23.4788	0.0809611	0.0875248	0	0.08268	0.087932	7.88242	0.0568707	7.11481	0.000135876	0.0290343	UP
